# Supplementary material
Source: Elsevier journal article supplement (https://www.sciencedirect.com/science/article/pii/S0034745021001347)

Supplementary material

**Table 1 – Supplementary material. Correlations between depression and anxiety scores and the PDQ-39 scores**

| Group   |            |         | Mobility | ADL   | Emotional well-being | Stigma | Social support | Cognition | Communication | Bodily discomfort | PDQ-39 SI | PDQ-39 SI Cog-adj | PDQ-39 SI Comm-adj |
|---------|------------|---------|----------|-------|----------------------|--------|----------------|-----------|---------------|-------------------|-----------|-------------------|--------------------|
| PD-nMCI | Depression | $\rho$  | .111     | .017  | .340                 | .479   | .545           | -.207     | -.105         | .214              | .330      | .324              | .361               |
|         |            | $P$     | .566     | .930  | .071                 | .009   | .002           | .282      | .588          | .265              | .080      | .086              | .054               |
|         |            | S-value | .82      | .1    | 3.82                 | 6.8    | 8.97           | 1.83      | .77           | 1.92              | 3.64      | 3.54              | 4.21               |
|         | Anxiety    | $\rho$  | -.023    | -.020 | .333                 | .175   | .203           | .188      | -.173         | .025              | .086      | .060              | .129               |
|         |            | $P$     | .906     | .919  | .078                 | .365   | .291           | .329      | .369          | .896              | .656      | .757              | .504               |
|         |            | S-value | .14      | .12   | 3.68                 | 1.45   | 1.78           | 1.6       | 1.44          | .16               | .61       | .4                | .99                |
| PD-MCI  | Depression | $\rho$  | .180     | .246  | .620                 | .190   | .162           | .424      | .448          | .212              | .497      | .422              | .497               |
|         |            | $P$     | .597     | .465  | .042                 | .576   | .635           | .194      | .167          | .532              | .120      | .196              | .120               |
|         |            | S-value | .74      | 1.1   | 4.57                 | .8     | .66            | 2.37      | 2.58          | .91               | 3.06      | 2.35              | 3.06               |
|         | Anxiety    | $\rho$  | .174     | .253  | .593                 | .176   | .114           | .417      | .438          | .162              | .482      | .406              | .482               |
|         |            | $P$     | .608     | .453  | .054                 | .605   | .738           | .202      | .178          | .634              | .134      | .215              | .134               |
|         |            | S-value | .72      | 1.14  | 4.21                 | 2.51   | .44            | 2.31      | 2.49          | .66               | 2.9       | 2.22              | 2.9                |

ADL: activities of daily living dimension; PD-MCI: Parkinson's disease with mild cognitive impairment; PD-nMCI: Parkinson's disease without mild cognitive impairment; PDQ-39 SI Cog-adj: Parkinson's Disease Questionnaire-39 adjusted summary index excluding items of the Cognition dimension; PDQ-39 SI Comm-adj: Parkinson's Disease Questionnaire-39 adjusted summary index excluding items of the Communication dimension; PDQ-39 SI: Parkinson's Disease Questionnaire-39 Summary Index.

**Table 2 – Supplementary material. Additional adjusted partial correlations between the global HRQoL and the Cognition and Communication dimensions in PD-nMCI and PD-MCI groups**

| Dimension     | Group   | Correlation with adjusted PDQ-39 Summary Index* |                   |             |                   |                                |                   |
|---------------|---------|-------------------------------------------------|-------------------|-------------|-------------------|--------------------------------|-------------------|
|               |         | Partial correlations (controlling for)          |                   |             |                   |                                |                   |
|               |         | Depression                                      |                   | Anxiety     |                   | UPDRS-III, Depression, Anxiety |                   |
|               |         | Coefficient                                     | P-value (S-value) | Coefficient | P-value (S-value) | Coefficient                    | P-value (S-value) |
| Cognition     | PD-MCI  | .694                                            | .026 (5.27)       | .698        | .025 (5.32)       | .716                           | .046 (4.44)       |
|               | PD-nMCI | .235                                            | .228 (2.13)       | .142        | .470 (1.09)       | .103                           | .103 (3.28)       |
| Communication | PD-MCI  | .723                                            | .018 (5.8)        | .727        | .017 (5.88)       | .716                           | .046 (4.44)       |
|               | PD-nMCI | .490                                            | .008 (6.97)       | .449        | .017 (5.88)       | .426                           | .030 (5.06)       |

PD-MCI: Parkinson's disease with mild cognitive impairment; PD-nMCI: Parkinson's disease without mild cognitive impairment; UPDRS-III: Unified Parkinson's Disease Rating Scale part III.

\*For the correlations with the Cognition dimension, the PDQ-39 Summary Index was calculated excluding the Cognition items. For the correlations with the Communication dimension, the PDQ-39 Summary Index was calculated excluding the Communication items.

Spearman partial correlations were controlled for depression, anxiety, and the combination of motor and mood symptoms, to control the effect of these possible confounders on the estimations of the models. Depression and anxiety were measured with the frequency \* severity scores of the Neuropsychiatric Inventory (NPI).

**Table 3 – Supplementary material. Exploratory analysis of the PDQ-39 Dimension-total correlations in the PD-MCI and PD-nMCI groups**

| PDQ-39 Dimensions    | PD-nMCI     |                 |         | PD-MCI      |                 |         |
|----------------------|-------------|-----------------|---------|-------------|-----------------|---------|
|                      | Coefficient | <i>P</i> -value | S-value | Coefficient | <i>P</i> -value | S-value |
| Mobility             | .675        | <.001           | 14.05   | .720        | .013            | 6.32    |
| ADL                  | .713        | <.001           | 16.12   | .902        | <.001           | 12.74   |
| Emotional well-being | .678        | <.001           | 14.18   | .679        | .022            | 5.53    |
| Stigma               | .733        | <.001           | 17.35   | .742        | .009            | 6.8     |
| Social support       | .101        | .603            | .73     | .567        | .069            | 3.85    |
| Cognition            | .238        | .215            | 2.22    | .781        | .005            | 7.78    |
| Communication        | .530        | .003            | 8.33    | .783        | .004            | 7.85    |
| Bodily discomfort    | .564        | .001            | 9.44    | .559        | .074            | 3.76    |

PD-MCI: Parkinson's disease with mild cognitive impairment; PD-nMCI: Parkinson's disease without mild cognitive impairment; UPDRS-III: Unified Parkinson's Disease Rating Scale part III.

Spearman partial correlations were controlled for depression, anxiety, and the combination of motor and mood symptoms, to control the effect of these possible confounders on the estimations of the models.

**Figure 1 – Supplementary material. Clinical and sociodemographic variables distributions in PD-nMCI and PD-MCI groups. A: age (years) boxplot distributions. B: years of education boxplot distributions. C: boxplot distributions of years since clinical diagnosis of Parkinson’s disease. D: levodopa equivalent daily dose boxplot distributions. E: Hoehn & Yahr stage boxplot distributions. F: Montreal Cognitive Assessment total score boxplot distributions. G: Neuropsychiatric Inventory total score boxplot distributions. H: Unified Parkinson’s Diseases Rating Score-part III (motor subscale) boxplot distributions. PD-MCI: Parkinson’s disease with mild cognitive impairment; PD-nMCI: Parkinson’s disease without MCI.**

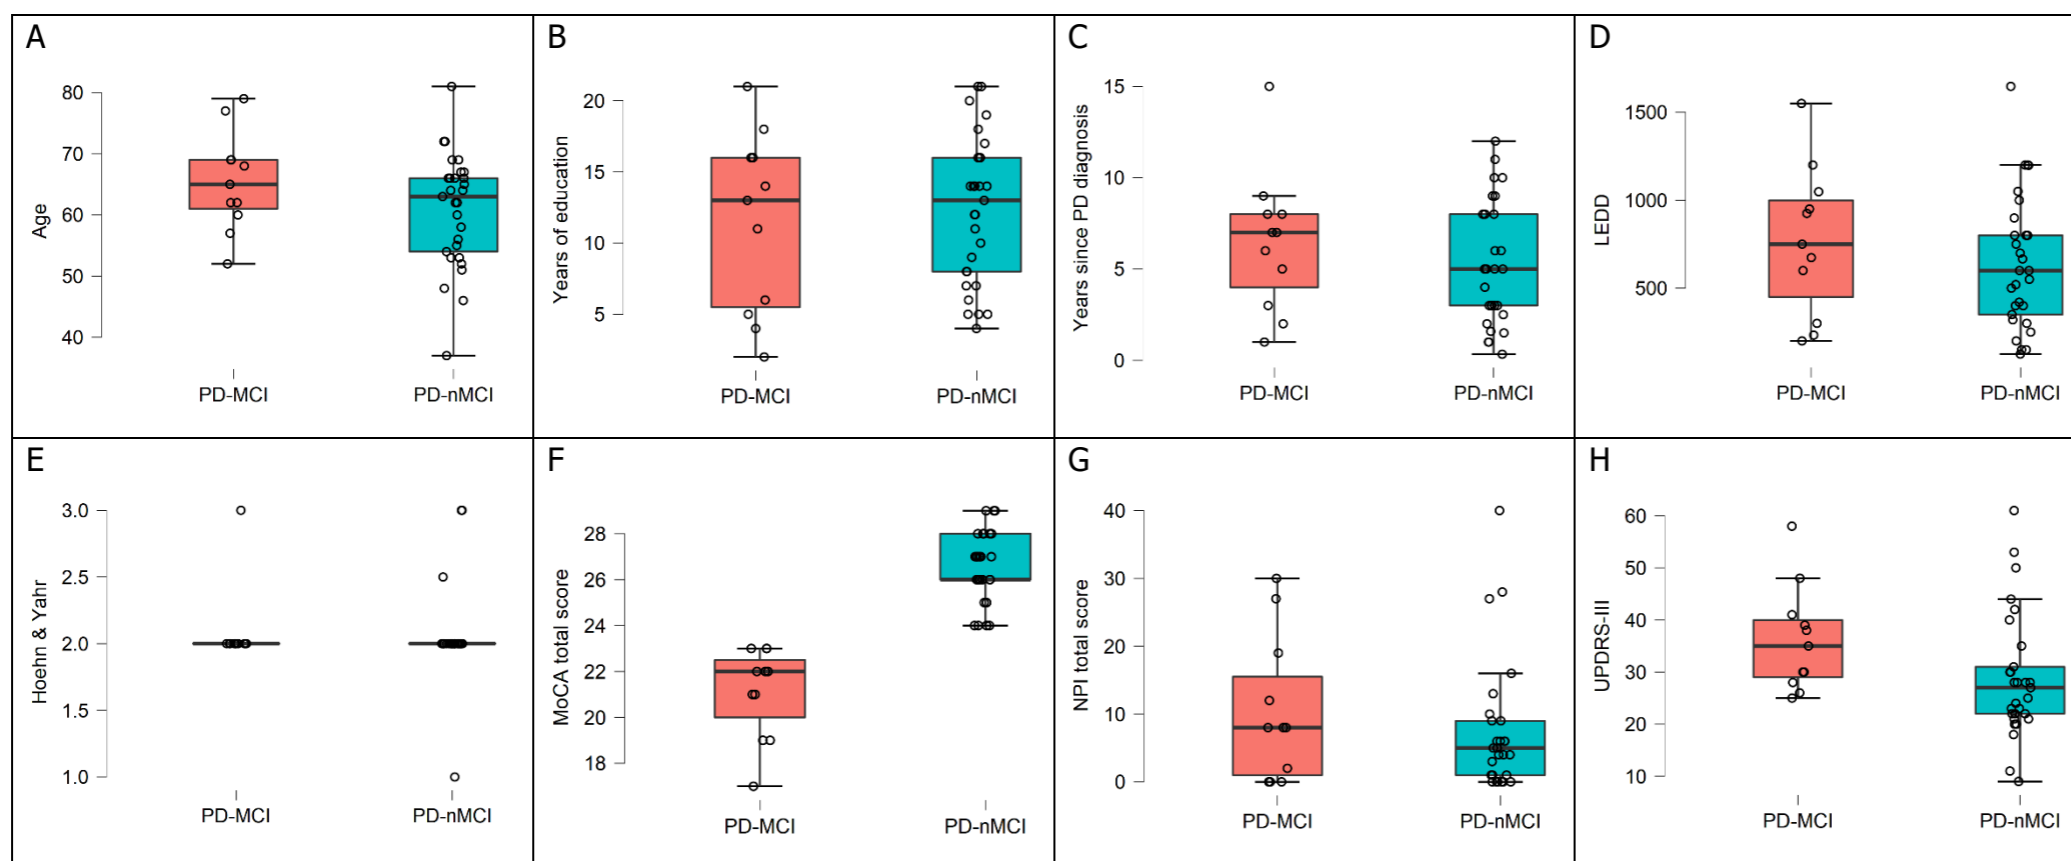

**Figure 2 – Supplementary material. HRQoL in PD-nMCI and PD-MCI groups. A: PDQ-39 Mobility dimension boxplot distributions. B: PDQ-39 Stigma dimension boxplot distributions. C: PDQ-39 Cognitions dimension boxplot distributions. D: PDQ-39 Activities of daily living dimension boxplot distributions. E: PDQ-39 Emotional wellbeing dimension boxplot distributions. F: PDQ-39 Social support dimension boxplot distributions. G: PDQ-39 Communication dimension boxplot distributions. H: PDQ-39 Bodily discomfort. I: PDQ-39 Summary Index boxplot distributions. J: Cognition-adjusted PDQ-39 Summary index (PDQ-39 Summary index excluding the Cognition dimension). K: PDQ-39 Communication-adjusted PDQ-39 Summary Index (PDQ-39 Summary Index excluding the Communication dimension) boxplot distributions. PD-MCI: Parkinson’s disease with mild cognitive impairment; PD-nMCI: Parkinson’s disease without MCI.**

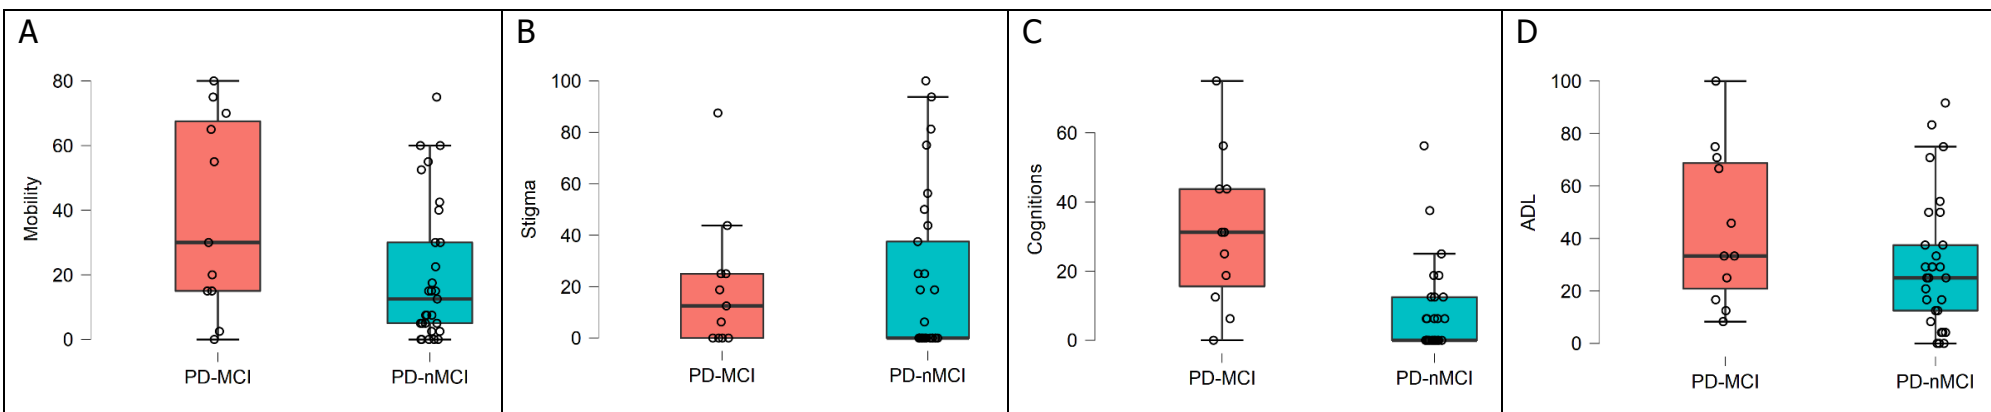

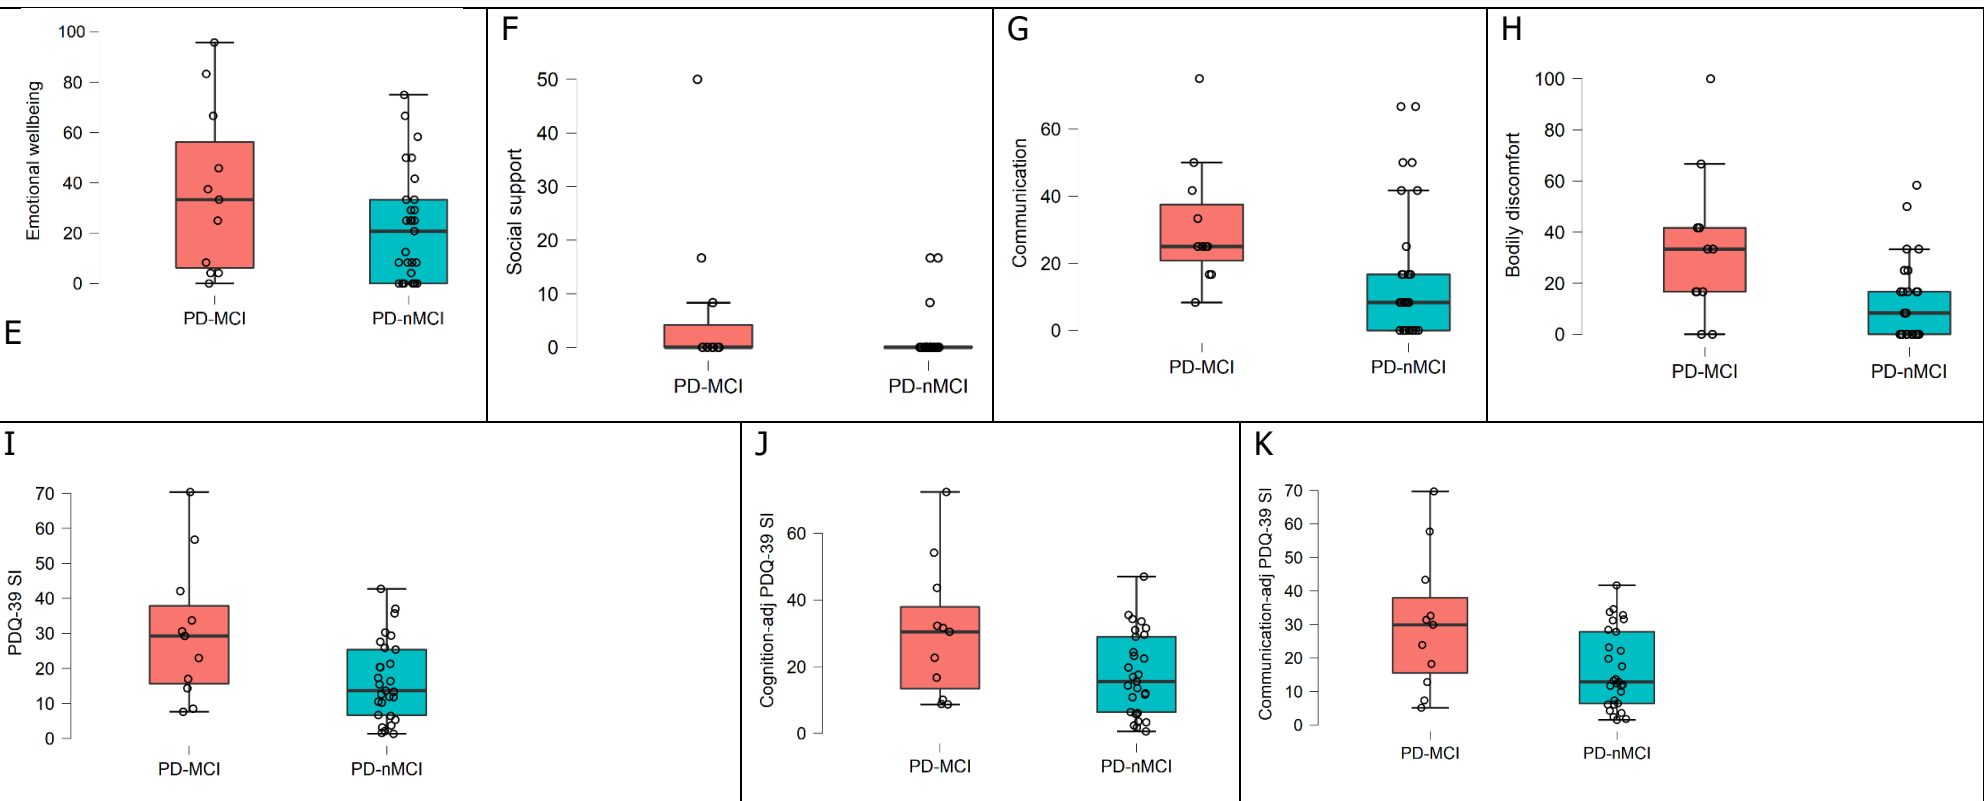

Supplement: mmc1 [file S0034745021001347:mmc1.pdf]
